# Supplementary material for: Five Novel Mutations in LOXHD1 Gene Were Identified to Cause Autosomal Recessive Nonsyndromic Hearing Loss in Four Chinese Families
Source: Hindawi journal article supplement (doi:10.1155/2020/1685974), 2020-01-01
Supplement: f1 [file 1685974.f1.pdf]

**Supplementary Table 1.** Summary of the 127 targeted deafness genes.

| Gene        | NS/S | Inheritance | mRNA           | Exons |
|-------------|------|-------------|----------------|-------|
| ACTG1       | NS   | AD          | NM_001199954.1 | 6     |
| ALMS1       | S    | AR          | NM_015120.4    | 23    |
| ATP2B2      | NS   | AR          | NM_001001331.2 | 23    |
| BSND        | NS/S | AR          | NM_057176.2    | 4     |
| CACNA1D     | NS/S | AR          | NM_000720.3    | 49    |
| CCDC50      | NS   | AD          | NM_178335.2    | 12    |
| CDH23       | NS/S | AR          | NM_022124.5,   | 70    |
| CEACAM16    | NS   | AD          | NM_001039213.3 | 7     |
| CHD7        | S    | AD          | NM_017780.3    | 38    |
| CLDN14      | NS   | AR          | NM_144492.2    | 3     |
| CLRN1       | NS/S | AR          | NM_174878.2    | 3     |
| COCH        | NS   | AD          | NM_001135058.1 | 11    |
| COL11A1     | S    | AR/AD       | NM_001854.3    | 67    |
| COL2A1      | S    | AD          | NM_033150.2    | 53    |
| COL4A3      | S    | AR          | NM_000091.4    | 52    |
| COL4A4      | S    | AR          | NM_000092.4    | 48    |
| COL4A5      | S    | X-linked    | NM_000495.4    | 51    |
| COL9A1      | S    | AR          | NM_001851.4    | 38    |
| COL9A2      | S    | AR          | NM_001852.3    | 32    |
| CRYM        | NS   | AD          | NM_001888.4    | 10    |
| DFNA5       | NS   | AD          | NM_004403.2    | 10    |
| DFNB31      | NS/S | AR          | NM_015404.3    | 12    |
| DFNB59/PJVK | NS   | AR          | NM_001042702.3 | 7     |
| DIABLO      | NS   | AD          | NM_019887.5    | 7     |
| DIAPH1      | NS   | AD          | NM_005219.4    | 28    |
| DIAPH3      | NS   | AD          | NM_001258366.1 | 27    |
| DLX5        | S    | AD          | NM_005221.5    | 3     |
| DSPP        | NS   | AD          | NM_014208.3    | 5     |
| EDN3        | S    | AD          | NM_207032.2    | 5     |
| EDNRB       | S    | AD          | NM_000115.3    | 8     |

---

|        |      |       |                |    |
|--------|------|-------|----------------|----|
| ESPN   | NS   | AR/AD | NM_031475.2    | 13 |
| ESRRB  | NS   | AR    | NM_004452.3    | 11 |
| EYA1   | S    | AD    | NM_000503.5    | 18 |
| EYA4   | NS   | AD    | NM_004100.4    | 20 |
| FGF3   | S    | AR    | NM_005247.2    | 3  |
| FGFR1  | S    | AD    | NM_023110.2    | 18 |
| FGFR2  | S    | AD    | NM_000141.4    | 18 |
| FGFR3  | S    | AD    | NM_000142.4    | 18 |
| FOXI1  | NS/S | AR/AD | NM_012188.4    | 2  |
| GATA3  | S    | AD    | NM_001002295.1 | 6  |
| GIPC3  | NS   | AR    | NM_133261.2    | 6  |
| GJA1   | NS   | AR    | NM_000165.4    | 2  |
| GJB2   | NS   | AR/AD | NM_004004.5    | 2  |
| GJB3   | NS   | AR/AD | NM_024009.2    | 2  |
| GJB6   | NS   | AR/AD | NM_001110219.2 | 5  |
| GLI3   | S    | AD    | NM_000168.5    | 15 |
| GPR98  | NS/S | AR    | NM_032119.3    | 90 |
| GPSM2  | NS   | AR    | NM_013296.4    | 15 |
| GRHL2  | NS   | AD    | NM_024915.3    | 16 |
| GRXCR1 | NS   | AR    | NM_001080476.2 | 4  |
| HGF    | NS   | AR    | NM_000601.4    | 18 |
| HOXA1  | S    | AR    | NM_005522.4    | 2  |
| HOXA2  | S    | AR    | NM_006735.3    | 2  |
| IGF1   | S    | AR    | NM_001111283.1 | 5  |
| ILDR1  | NS   | AR    | NM_001199799.1 | 8  |
| KCNE1  | NS/S | AR    | NM_000219.5    | 4  |
| KCNJ10 | NS/S | AR    | NM_002241.4    | 2  |
| KCNQ1  | NS/S | AR    | NM_000218.2    | 16 |
| KCNQ4  | NS   | AD    | NM_004700.3    | 14 |
| LHFPL5 | NS   | AR    | NM_182548.3    | 4  |
| LOXHD1 | NS   | AR    | NM_144612.6    | 40 |
| LRP2   | S    | AR    | NM_004525.2    | 79 |
| LRTOMT | NS   | AR    | NM_145309.5    | 6  |

---

---

|          |      |          |                |    |
|----------|------|----------|----------------|----|
| MARVELD2 | NS   | AR       | NM_001038603.2 | 7  |
| MIR96    | NS   | AD       | NR_029512.1    |    |
| MITF     | S    | AD       | NM_198159.2    | 10 |
| MSRB3    | NS   | AR       | NM_198080.3    | 6  |
| MT-RNR1  | NS   | MT       | —              |    |
| MT-TE    | S    | MT       | —              |    |
| MT-TK    | S    | MT       | —              |    |
| MT-TL1   | S    | MT       | —              |    |
| MT-TS1   | NS   | MT       | —              |    |
| MYH14    | NS   | AD       | NM_001077186.1 | 42 |
| MYH9     | NS   | AD       | NM_002473.5    | 41 |
| MYO15A   | NS   | AR       | NM_016239.3    | 66 |
| MYO1A    | NS   | AD       | NM_001256041.1 | 29 |
| MYO3A    | NS   | AR       | NM_017433.4    | 35 |
| MYO6     | NS   | AR/AD    | NM_004999.3    | 35 |
| MYO7A    | NS/S | AR/AD    | NM_000260.3    | 49 |
| NDP      | S    | X-linked | NM_000266.3    | 3  |
| OPA1     | S    | AD       | NM_015560.2    | 29 |
| OTOA     | NS   | AR       | NM_144672.3    | 28 |
| OTOF     | NS   | AR       | NM_194248.2    | 47 |
| OTOG     | NS   | AR       | NM_001277269.1 | 55 |
| PAX2     | S    | AD       | NM_003987.3    | 11 |
| PAX3     | S    | AD       | NM_181457.3    | 8  |
| PCDH15   | NS/S | AR       | NM_001142765.1 | 32 |
| PDSS1    | S    | AR       | NM_014317.3    | 12 |
| PDZD7    | NS/S | AR       | NM_001195263.1 | 17 |
| PHEX     | S    | X-linked | NM_000444.5    | 22 |
| POU3F4   | NS   | X-linked | NM_000307.4    | 1  |
| POU4F3   | NS   | AD       | NM_002700.2    | 2  |
| PRPS1    | NS   | X-linked | NM_002764.3    | 7  |
| PRRX1    | S    | AR       | NM_022716.3    | 4  |
| PTPRQ    | NS   | AR       | NM_001145026.1 | 45 |
| RDX      | NS   | AR       | NM_001260492.1 | 16 |

---

|           |      |          |                |    |
|-----------|------|----------|----------------|----|
| SEMA3E    | S    | AR       | NM_012431.2    | 17 |
| SERAC1    | S    | AR       | NM_032861.3    | 17 |
| SERPINB6  | NS   | AR       | NM_001297699.1 | 7  |
| SIX1      | NS/S | AD       | NM_005982.3    | 2  |
| SIX5      | S    | AD       | NM_175875.4    | 3  |
| SLC17A8   | NS   | AD       | NM_139319.2    | 12 |
| SLC19A2   | S    | AR       | NM_006996.2    | 6  |
| SLC26A4   | NS/S | AR       | NM_000441.1    | 21 |
| SLC26A5   | NS   | AR       | NM_198999.2    | 20 |
| SLC4A11   | S    | AR       | NM_001174090.1 | 20 |
| SMAD4     | S    | AD       | NM_005359.5    | 12 |
| SMPX      | NS   | X-linked | NM_014332.2    | 5  |
| SNAI2     | S    | AD       | NM_003068.4    | 3  |
| SOBP      | S    | AR       | NM_018013.3    | 7  |
| SOX10     | S    | AD       | NM_006941.3    | 4  |
| SOX9      | S    | AD       | NM_000346.3    | 3  |
| STRC      | NS   | AR       | NM_153700.2    | 29 |
| TCOF1     | S    | AD       | NM_001135244.1 | 26 |
| TECTA     | NS   | AR/AD    | NM_005422.2    | 23 |
| TIMM8A    | NS/S | X-linked | NM_004085.3    | 2  |
| TJP2      | NS   | AD       | NM_004817.3    | 23 |
| TMC1      | NS   | X-linked | NM_138691.2    | 24 |
| TMIE      | NS   | AR       | NM_147196.2    | 4  |
| TMPRSS3   | NS   | AR       | NM_024022.2    | 13 |
| TNFRSF11B | S    | AD       | NM_002546.3    | 5  |
| TPRN      | NS   | AR       | NM_001128228.2 | 4  |
| TRIOBP    | NS   | AR       | NM_138632.2    | 8  |
| USH1C     | NS/S | AR       | NM_005709.3    | 21 |
| USH1G     | NS/S | AR       | NM_173477.4    | 3  |
| USH2A     | NS/S | AR       | NM_206933.2    | 72 |
| WFS1      | NS/S | AR/AD    | NM_006005.3    | 8  |

NS: Non-Syndromic; S: Syndromic; AR: Autosomal Recessive; AD: Autosomal

Dominant; MT: Mitochondrial Inheritance

Supplementary figure 1

F098\* I-1

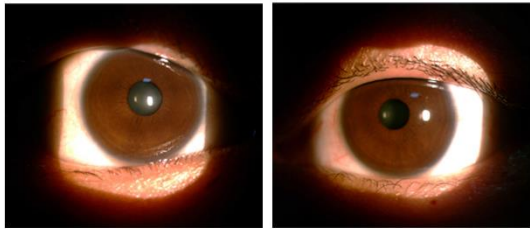

OD

OS

F098\* I-2

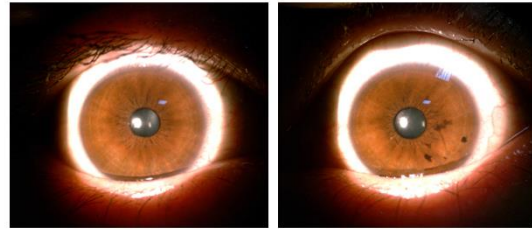

OD

OS

F098\* II-1

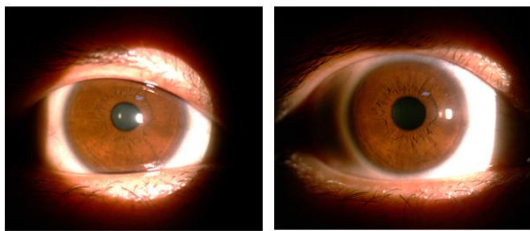

OD

OS

F098\* II-2

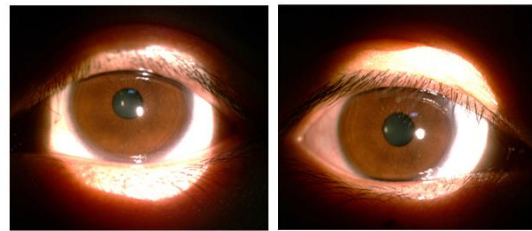

OD

OS
